# Supplementary material for: Metapopulation ecology links antibiotic resistance, consumption, and patient transfers in a network of hospital wards
Source: eLife journal article supplement (doi:10.7554/elife.54795), 2020-10-26
Supplement: supp [file elife-54795-supp-v1.zip]

EC

 $R^2 = 0.31$  (0.24, 0.39)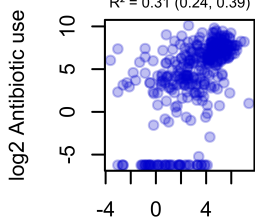

log2 Incidence control

3GCREC

 $R^2 = 0.33$  (0.25, 0.41)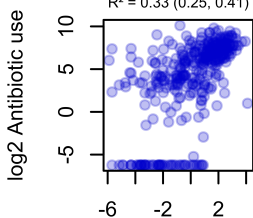

log2 Incidence control

CREC

 $R^2 = 0.34$  (0.26, 0.42)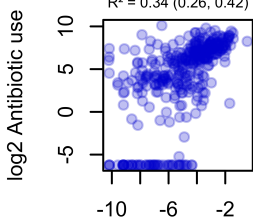

log2 Incidence control

KP

 $R^2 = 0.33$  (0.25, 0.41)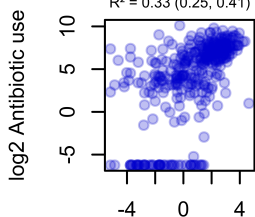

log2 Incidence control

3GCRKP

 $R^2 = 0.33$  (0.26, 0.41)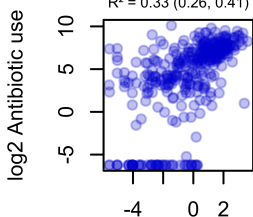

log2 Incidence control

CRKP

 $R^2 = 0.32$  (0.24, 0.40)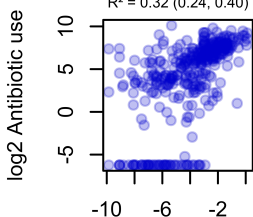

log2 Incidence control

EB

 $R^2 = 0.33$  (0.25, 0.41)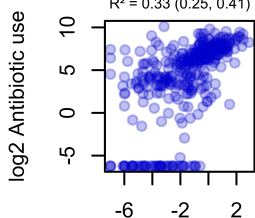

log2 Incidence control

3GCREB

 $R^2 = 0.33$  (0.25, 0.41)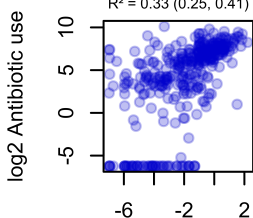

log2 Incidence control

CREB

 $R^2 = 0.34$  (0.26, 0.41)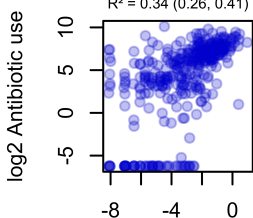

log2 Incidence control

PA

 $R^2 = 0.31$  (0.23, 0.39)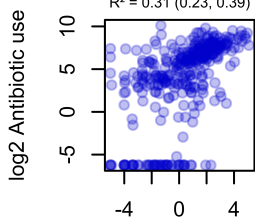

log2 Incidence control

CRPA

 $R^2 = 0.30$  (0.22, 0.38)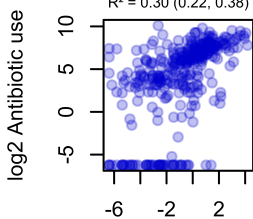

log2 Incidence control

AB

 $R^2 = 0.30$  (0.22, 0.38)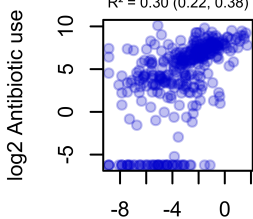

log2 Incidence control

CRAB

 $R^2 = 0.34$  (0.26, 0.42)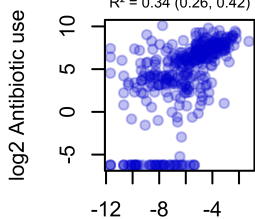

log2 Incidence control

EF

 $R^2 = 0.35$  (0.27, 0.43)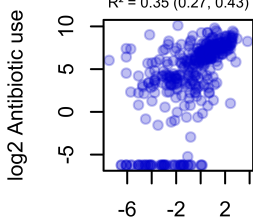

log2 Incidence control

VREF

 $R^2 = 0.32$  (0.24, 0.40)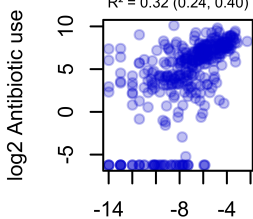

log2 Incidence control

SA

 $R^2 = 0.29$  (0.22, 0.37)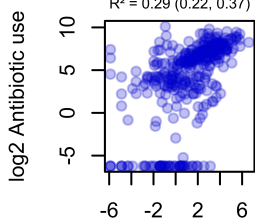

log2 Incidence control

MRSA

 $R^2 = 0.32$  (0.25, 0.40)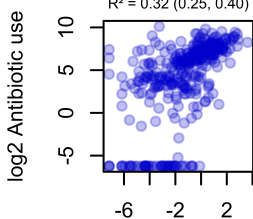

log2 Incidence control

All Bacteria

 $R^2 = 0.34$  (0.25, 0.40)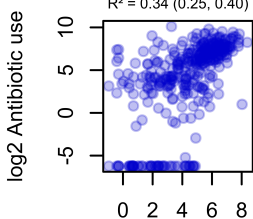

log2 Incidence control
