# Supplementary material for: Metapopulation ecology links antibiotic resistance, consumption, and patient transfers in a network of hospital wards
Source: eLife journal article supplement (doi:10.7554/elife.54795), 2020-10-26
Supplement: supp [file elife-54795-supp-v1.zip]

Archive with 8 entries (8 files):
- elife_poa_e54795_Transparent_Reporting_File.docx
- elife_poa_e54795_Supplementary_file_1.docx
- elife_poa_e54795_Figure_1_figure_supplement_1.pdf
- elife_poa_e54795_Figure_1_figure_supplement_2.pdf
- elife_poa_e54795_Figure_1_figure_supplement_3.pdf
- elife_poa_e54795_Figure_1_figure_supplement_4.pdf
- elife_poa_e54795_Figure_1_figure_supplement_5.pdf
- elife_poa_e54795_Figure_1_figure_supplement_6.pdf
