# Supplementary material for: Metapopulation ecology links antibiotic resistance, consumption, and patient transfers in a network of hospital wards
Source: eLife journal article supplement (doi:10.7554/elife.54795), 2020-10-26
Supplement: supp [file elife-54795-supp-v1.zip › elife_poa_e54795_Figure_1_figure_supplement_5.pdf]

EC

 $R^2 = 0.28$  (0.20, 0.36)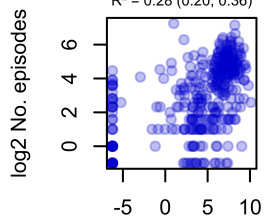

log2 Antibiotic use

3GCREC

 $R^2 = 0.22$  (0.15, 0.30)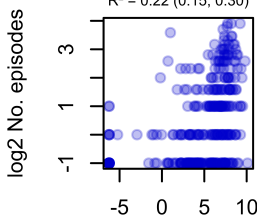

log2 Antibiotic use

CREC

 $R^2 = 0.02$  (0.00, 0.07)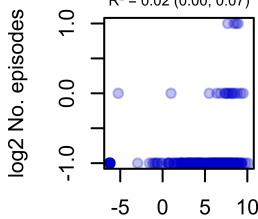

log2 Antibiotic use

KP

 $R^2 = 0.22$  (0.15, 0.30)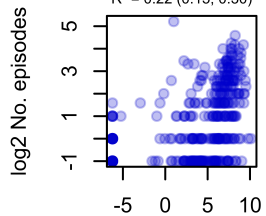

log2 Antibiotic use

3GCRKP

 $R^2 = 0.20$  (0.13, 0.28)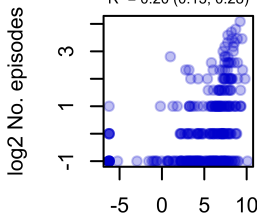

log2 Antibiotic use

CRKP

 $R^2 = 0.06$  (0.02, 0.11)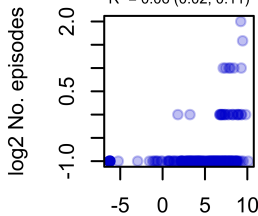

log2 Antibiotic use

EB

 $R^2 = 0.12$  (0.06, 0.18)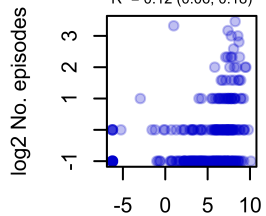

log2 Antibiotic use

3GCREB

 $R^2 = 0.15$  (0.09, 0.22)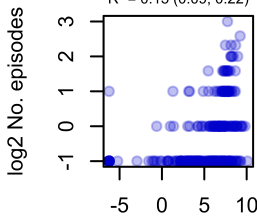

log2 Antibiotic use

CREB

 $R^2 = 0.09$  (0.04, 0.15)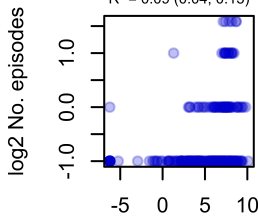

log2 Antibiotic use

PA

 $R^2 = 0.25$  (0.17, 0.33)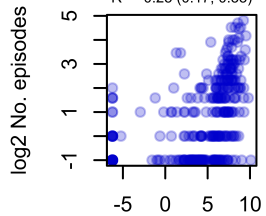

log2 Antibiotic use

CRPA

 $R^2 = 0.16$  (0.09, 0.23)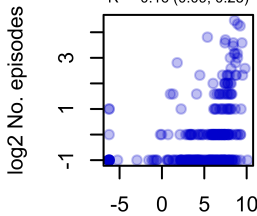

log2 Antibiotic use

AB

 $R^2 = 0.05$  (0.02, 0.11)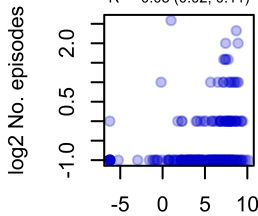

log2 Antibiotic use

CRAB

 $R^2 = 0.02$  (0.00, 0.06)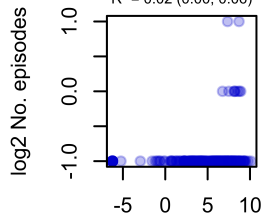

log2 Antibiotic use

EF

 $R^2 = 0.16$  (0.10, 0.24)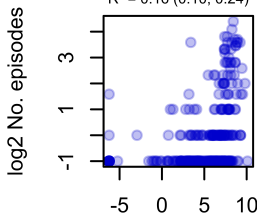

log2 Antibiotic use

VREF

 $R^2 = 0.01$  (0.00, 0.04)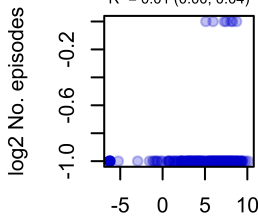

log2 Antibiotic use

SA

 $R^2 = 0.23$  (0.16, 0.31)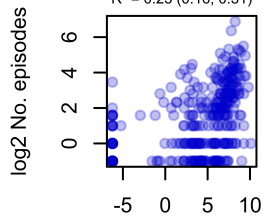

log2 Antibiotic use

MRSA

 $R^2 = 0.11$  (0.05, 0.17)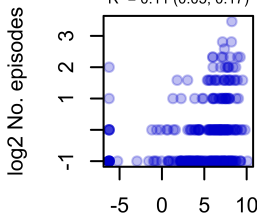

log2 Antibiotic use

All Bacteria

 $R^2 = 0.35$  (0.27, 0.43)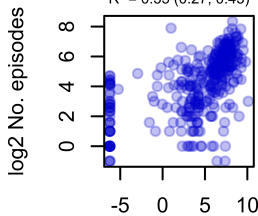

log2 Antibiotic use
