# Supplementary material for: Metapopulation ecology links antibiotic resistance, consumption, and patient transfers in a network of hospital wards
Source: eLife journal article supplement (doi:10.7554/elife.54795), 2020-10-26
Supplement: supp [file elife-54795-supp-v1.zip › elife_poa_e54795_Supplementary_file_1.docx]

Metapopulation ecology links antibiotic resistance, consumption and patient transfers in a network of hospital wards

Julie Teresa Shapiro1, Gilles Leboucher2, Anne-Florence Myard-Dury3, Pascale Girardo4, Anatole Luzatti4, Mélissa Mary4, Jean-François Sauzon4, Bénédicte Lafay5, Olivier Dauwalder4, Gérard Lina1,4, Christian Chidiac6, Sandrine Couray-Targe3, François Vandenesch1,4, Jean-Pierre Flandrois5, Jean-Philippe Rasigade1,4*

1Centre International de Recherche en Infectiologie, CIRI INSERM U1111, University of Lyon, France.

2Département de Pharmacie, Hospices Civils de Lyon, Lyon, France.

3Pôle de Santé Publique, Département d'Information Médicale, Hospices Civils de Lyon, Lyon, France.

4Institut des Agents Infectieux, Hospices Civils de Lyon, Lyon, France.

5Laboratoire de Biométrie et Biologie Evolutive, UMR CNRS 5558, University of Lyon, France.

6Service des Maladies Infectieuses et Tropicales, Hospices Civils de Lyon, Lyon, France.

**Supplementary File 1**

**Table 1a. Summary statistics (mean, interquartile range) of connectivity for each variant.**

| **Taxon** | **Resistance profile** | **Acronym** | **Mean Connectivity (Interquartile Range)** |
| --- | --- | --- | --- |
| *Escherichia coli* | Susceptible to 3GC and carbapenems | EC | 168.2 (16.2, 177.3) |
|  | 3GC-resistant | 3GCREC | 11.8 (1.0, 12.2) |
|  | Carbapenem-resistant | CREC | 0.15 (0.003, 0.13) |
| *Klebsiella pneumoniae* | Susceptible to 3GC and carbapenems | KP | 20.6 (1.8, 21.3) |
|  | 3GC-resistant | 3GCRKP | 5.5 (0.4, 6.0) |
|  | Carbapenem-resistant | CRKP | 0.21 (0.0, 0.23) |
| *Enterobacter cloacae* complex | Susceptible to 3GC and carbapenems | EB | 4.9 (0.3, 4.3) |
| 3GC-resistant | 3GCREB | 1.5 (0.1, 1.6) |
| Carbapenem-resistant | CREB | 0.74 (0.03, 0.73) |
| *Pseudomonas aeruginosa* | Carbapenem-susceptible | PA | 19.8 (1.7, 20.3) |
|  | Carbapenem-resistant | CRPA | 3.9 (0.2, 4.4) |
| *Acinetobacter baumannii* | Carbapenem-susceptible | AB | 1.7 (0.1, 1.3) |
|  | Carbapenem-resistant | CRAB | 0.69 (0.0, 0.3) |
| *Enterococcus faecium* | Vancomycin-susceptible | EF | 3.5 (0.1, 3.6) |
|  | Vancomycin-resistant | VREF | 0.09 (0.00, 0.02) |
| *Staphylococcus aureus* | Methicillin-susceptible | SA | 273 (5.9, 67.2) |
|  | Methicillin-resistant | MRSA | 151 (0.5, 6.4) |

**Table 1b. Comparison of log-likelihood values from multivariable Poisson and negative binomial regressions and overdispersion parameters from quasi-Poisson multivariable regression of the incidence of infections with 17 pathogen variants. All models included total antibiotic consumption, connectivity, ward size, ward type, and the incidence control value as variables.**

| Variant | Poisson loglik | Negative binomial loglik | Quasi-Poisson Theta |
| --- | --- | --- | --- |
| EC | -917.4 | -908.1 | 1.26 |
| 3GCREC | -509.4 | -502.2 | 1.21 |
| CREC | -65.5 | -65.5 | 0.87 |
| KP | -550.6 | -550.6 | 0.99 |
| C3GRKP | -432.7 | -427.2 | 1.31 |
| CRKP | -96.6 | -96.4 | 0.68 |
| EB | -323.2 | -322.3 | 1.67 |
| 3GCREB | -274.5 | -274.1 | 1.13 |
| CREB | -190.2 | -190.1 | 1.03 |
| PA | -555.2 | -552.8 | 1.13 |
| CRPA | -371.1 | -359.5 | 1.80 |
| AB | -179.2 | -175.9 | 1.20 |
| CRAB | -28.6 | -28.6 | 0.25 |
| EF | -433.2 | -388.9 | 2.51 |
| VREF | -23.6 | -23.6 | 0.74 |
| SA | -761.1 | -706.1 | 1.67 |
| MRSA | -387.6 | -380.6 | 1.45 |
