# Supplementary material for: Metapopulation ecology links antibiotic resistance, consumption, and patient transfers in a network of hospital wards
Source: eLife journal article supplement (doi:10.7554/elife.54795), 2020-10-26
Supplement: supp [file elife-54795-supp-v1.zip › elife_poa_e54795_Transparent_Reporting_File.docx]

***eLife’s* transparent reporting form**

We encourage authors to provide detailed information *within their submission* to facilitate the interpretation and replication of experiments. Authors can upload supporting documentation to indicate the use of appropriate reporting guidelines for health-related research (see [EQUATOR Network](http://www.equator-network.org/%20)), life science research (see the [BioSharing Information Resource](https://biosharing.org/)), or the [ARRIVE guidelines](http://www.plosbiology.org/article/info:doi/10.1371/journal.pbio.1000412) for reporting work involving animal research. Where applicable, authors should refer to any relevant reporting standards documents in this form.

If you have any questions, please consult our Journal Policies and/or contact us: [editorial@elifesciences.org](mailto:editorial@elifesciences.org).

**Sample-size estimation**

- You should state whether an appropriate sample size was computed when the study was being designed
- You should state the statistical method of sample size computation and any required assumptions
- If no explicit power analysis was used, you should describe how you decided what sample (replicate) size (number) to use

Please outline where this information can be found within the submission (e.g., sections or figure legends), or explain why this information doesn’t apply to your submission:

Because the study is observational, sample size was not determined a priori. Replication does not apply here. All information regarding sample sizes is described in the Results (lines 95 – 110), Methods under the heading “Data collection and compilation” (lines 477 – 497) and “Statistical analysis” (lines 585 – 586), and in Table 1.

The sample size for this study was based on the total number of routine clinical samples collected in the Hospices Civils de Lyon (HCL) network, representing all data available. The statistical unit for analysis was the hospital ward.

**Replicates**

- You should report how often each experiment was performed
- You should include a definition of biological versus technical replication
- The data obtained should be provided and sufficient information should be provided to indicate the number of independent biological and/or technical replicates
- If you encountered any outliers, you should describe how these were handled
- Criteria for exclusion/inclusion of data should be clearly stated
- High-throughput sequence data should be uploaded before submission, with a private link for reviewers provided (these are available from both GEO and ArrayExpress)

Please outline where this information can be found within the submission (e.g., sections or figure legends), or explain why this information doesn’t apply to your submission:

The data analysed in this study are observational, not experimental.

Criteria for exclusion / inclusion of data are detailed in the Methods section under the heading “Data collection and compilation” (lines 477 – 497).

**Statistical reporting**

- Statistical analysis methods should be described and justified
- Raw data should be presented in figures whenever informative to do so (typically when N per group is less than 10)
- For each experiment, you should identify the statistical tests used, exact values of N, definitions of center, methods of multiple test correction, and dispersion and precision measures (e.g., mean, median, SD, SEM, confidence intervals; and, for the major substantive results, a measure of effect size (e.g., Pearson's r, Cohen's d)
- Report exact p-values wherever possible alongside the summary statistics and 95% confidence intervals. These should be reported for all key questions and not only when the p-value is less than 0.05.

Please outline where this information can be found within the submission (e.g., sections or figure legends), or explain why this information doesn’t apply to your submission:

Statistical analysis methods are described and justified in the Methods section under the heading “Statistical analysis” (lines 585 – 662). Beta coefficients and 95% confidence intervals are reported in the Results text and in Table 3. On the advice of the reviewers, we have replaced exact p-values with 95% confidence intervals throughout the text.

Beta coefficients and 95% confidence intervals are also shown in Figures 1, 2, and 3.

Raw data are described in Table 1, Table 2, Supplementary Table 1, and shown in Supplementary Figure 1.

(For large datasets, or papers with a very large number of statistical tests, you may upload a single table file with tests, Ns, etc., with reference to sections in the manuscript.)

**Group allocation**

- Indicate how samples were allocated into experimental groups (in the case of clinical studies, please specify allocation to treatment method); if randomization was used, please also state if restricted randomization was applied
- Indicate if masking was used during group allocation, data collection and/or data analysis

Please outline where this information can be found within the submission (e.g., sections or figure legends), or explain why this information doesn’t apply to your submission:

This observational study did not involve randomization or masking.

**Additional data files (“source data”)**

- We encourage you to upload relevant additional data files, such as numerical data that are represented as a graph in a figure, or as a summary table
- Where provided, these should be in the most useful format, and they can be uploaded as “Source data” files linked to a main figure or table
- Include model definition files including the full list of parameters used
- Include code used for data analysis (e.g., R, MatLab)
- Avoid stating that data files are “available upon request”

Please indicate the figures or tables for which source data files have been provided:

Source data are represented in Table 1, Table 2, Supplementary Table 1, and Supplementary Figure 1.

Model parameters are described in the Methods section.

All source data and R code is freely available at <https://github.com/rasigadelab/metapop>.
