# Supplementary figures and images for: Metapopulation ecology links antibiotic resistance, consumption, and patient transfers in a network of hospital wards
Source: eLife journal article supplement (doi:10.7554/elife.54795), 2020-10-26

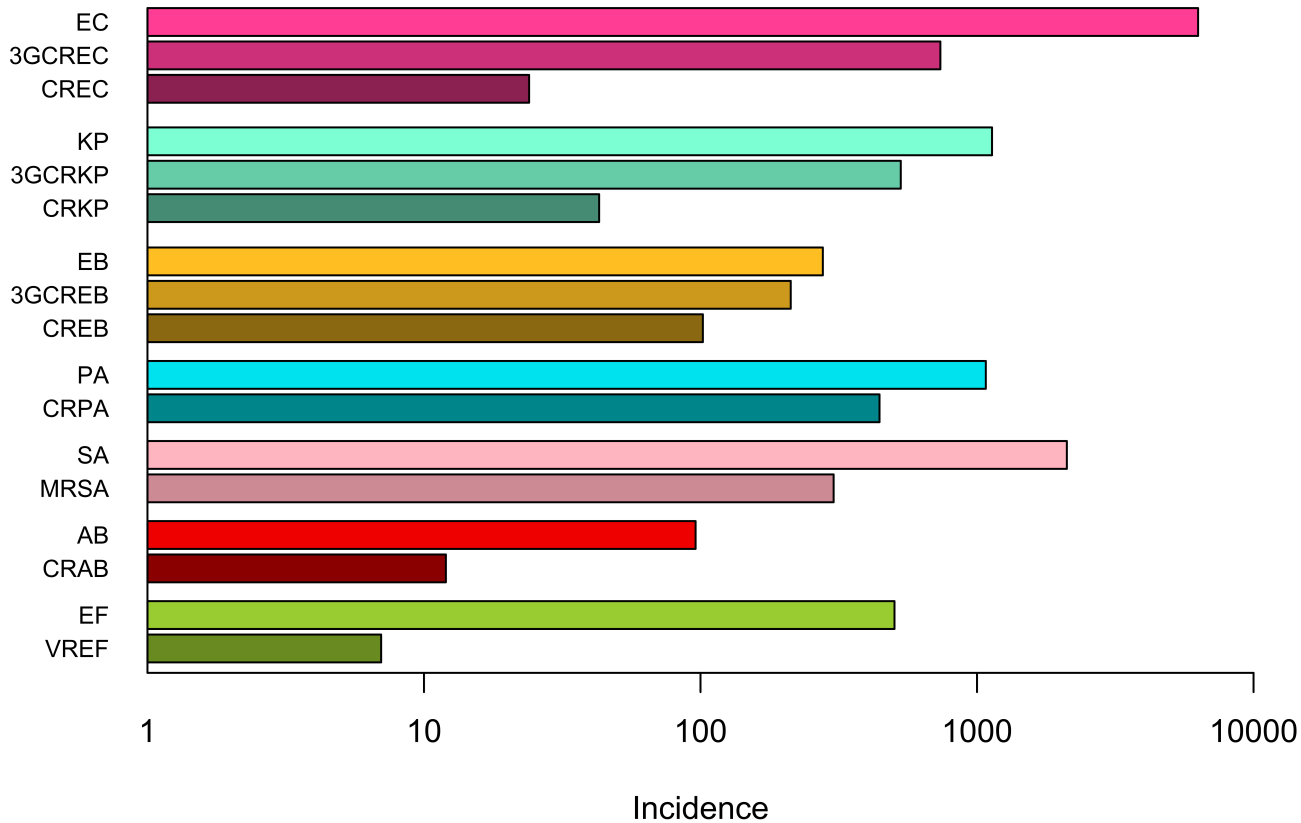

Supplement: supp [file elife-54795-supp-v1.zip › elife_poa_e54795_Figure_1_figure_supplement_1.pdf]

## Variable type

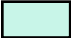 Unrepresentable

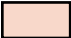 Observed

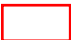 Proxy

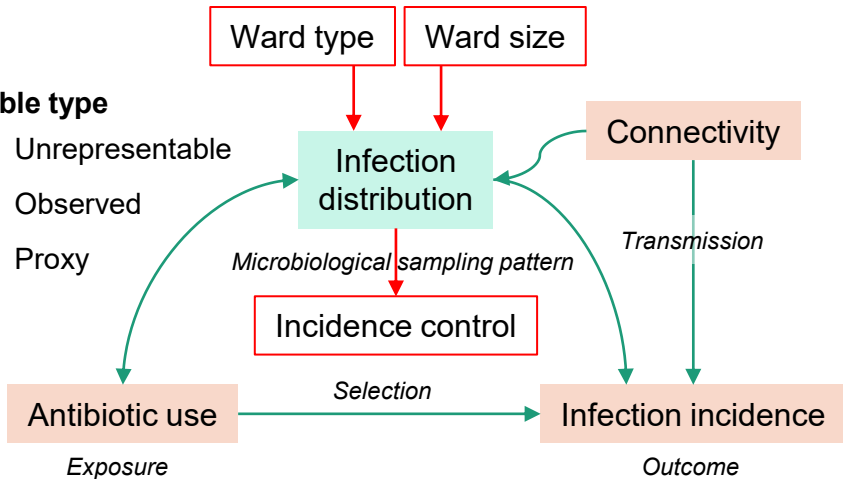

Supplement: supp [file elife-54795-supp-v1.zip › elife_poa_e54795_Figure_1_figure_supplement_2.pdf]

EC

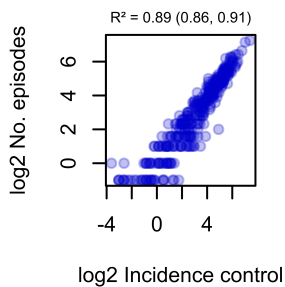

3GCREC

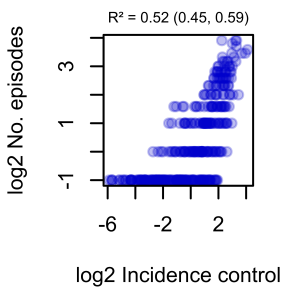

CREC

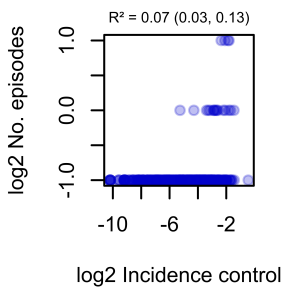

KP

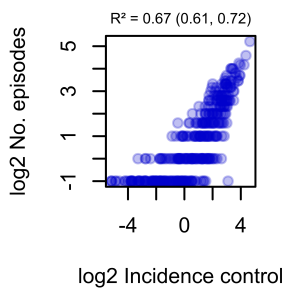

3GCRKP

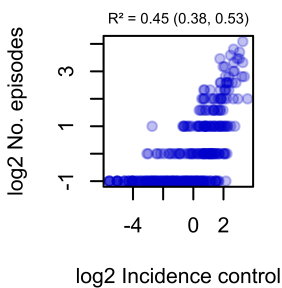

CRKP

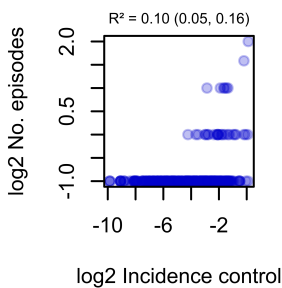

EB

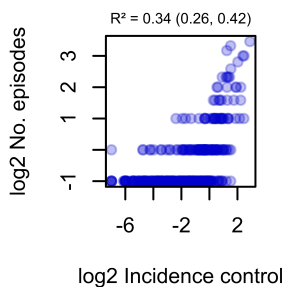

3GCREB

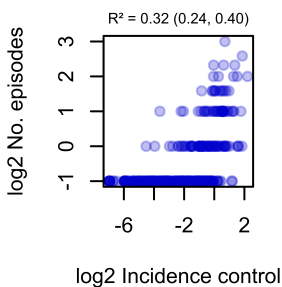

CREB

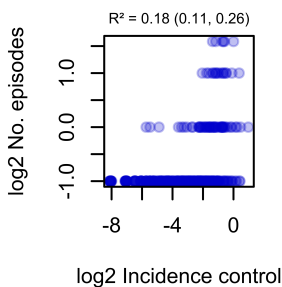

PA

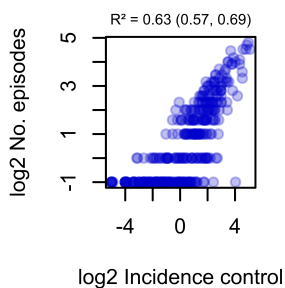

CRPA

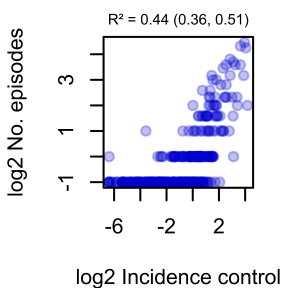

AB

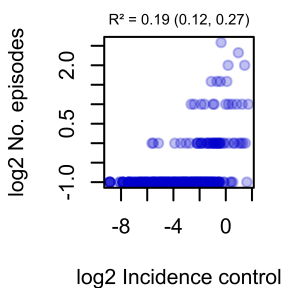

CRAB

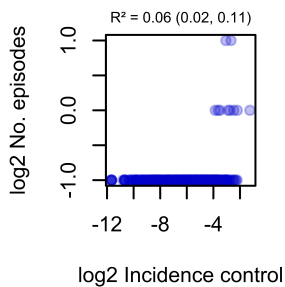

EF

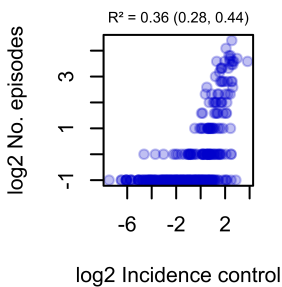

VREF

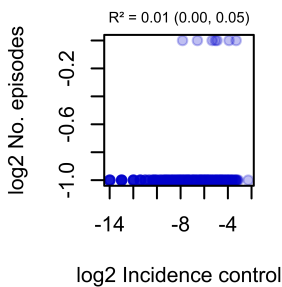

SA

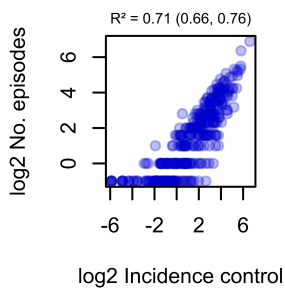

MRSA

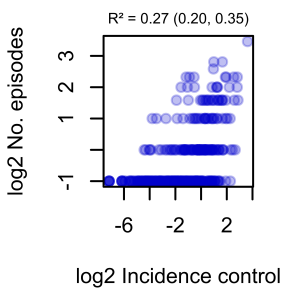

All Bacteria

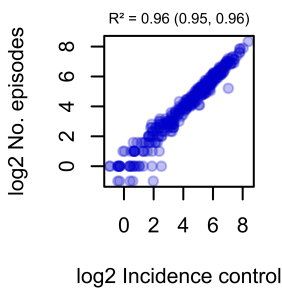

Supplement: supp [file elife-54795-supp-v1.zip › elife_poa_e54795_Figure_1_figure_supplement_3.pdf]

EC

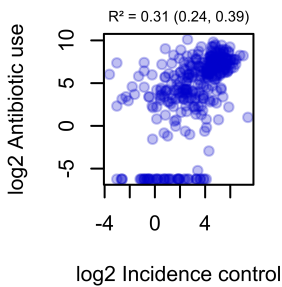

3GCREC

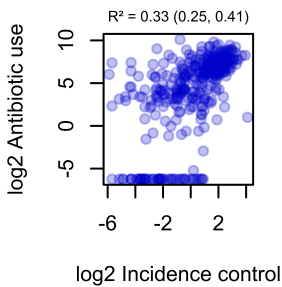

CREC

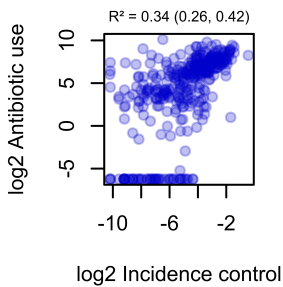

KP

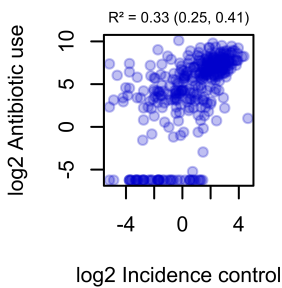

3GCRKP

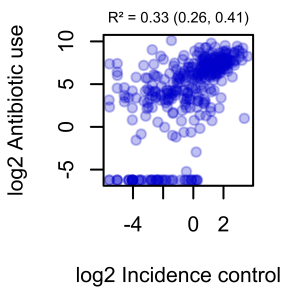

CRKP

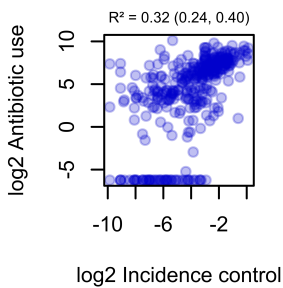

EB

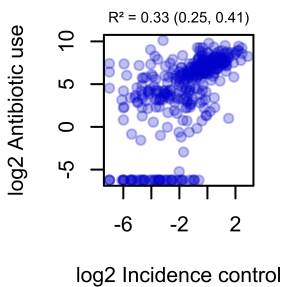

3GCREB

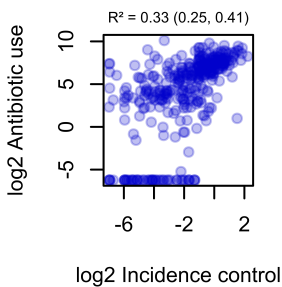

CREB

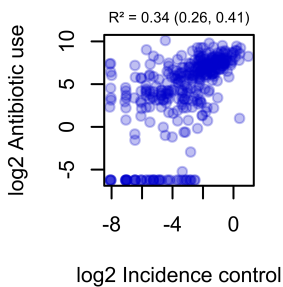

PA

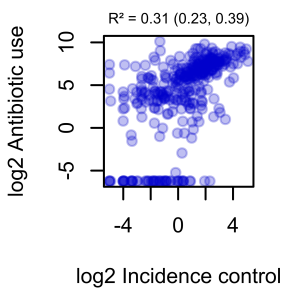

CRPA

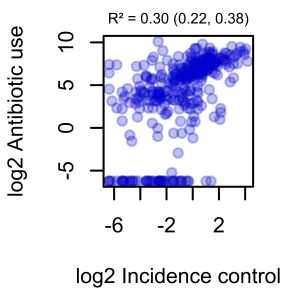

AB

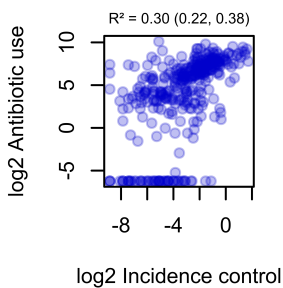

CRAB

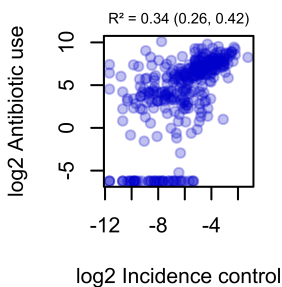

EF

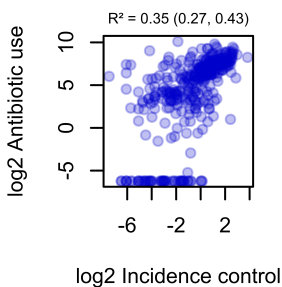

VREF

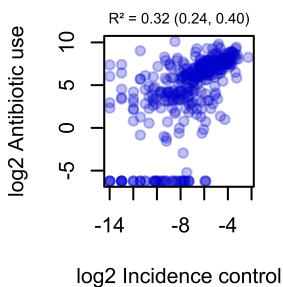

SA

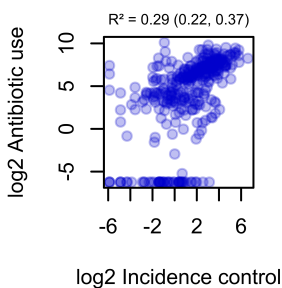

MRSA

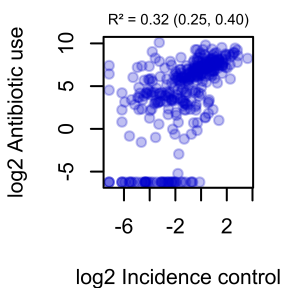

All Bacteria

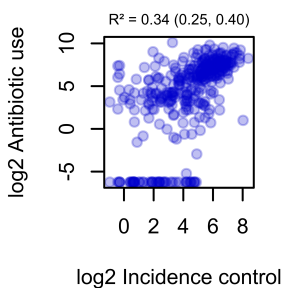

Supplement: supp [file elife-54795-supp-v1.zip › elife_poa_e54795_Figure_1_figure_supplement_4.pdf]

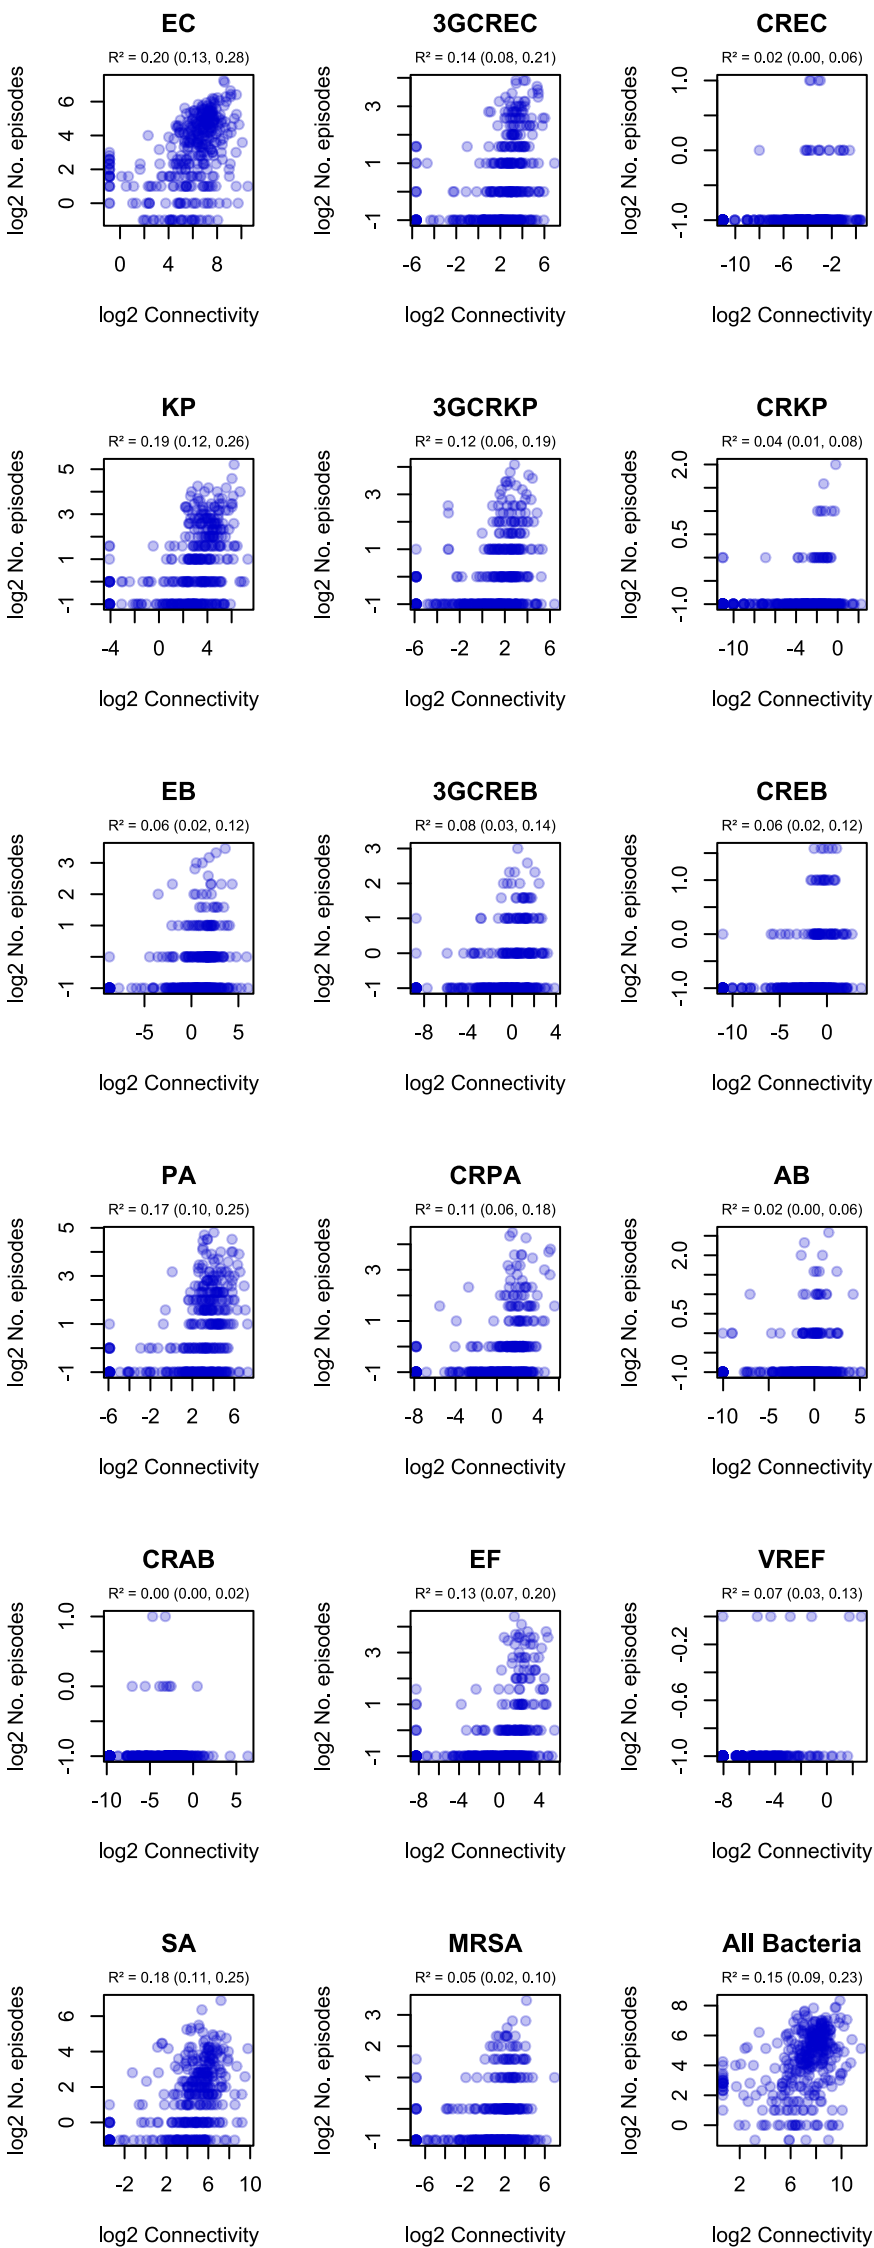

Supplement: supp [file elife-54795-supp-v1.zip › elife_poa_e54795_Figure_1_figure_supplement_6.pdf]
